# Supplementary material for: Are There Sex Differences in Self-Reported Childhood Maltreatment in Major Depressive and Bipolar Disorders? A Retrospective Cross-Sectional Study
Source: Preprints.org preprint supplement (doi:10.20944/preprints202205.0409.v1), 2022-05-31
Supplement: Supplementary file 1 [file supplementary]

| **Table S1. Descriptive statistics and comparisons of the two entire samples** |  |  |  |  |  |  |
| --- | --- | --- | --- | --- | --- | --- |
|  | **Patients with MDD (N= 335)** | | **Patients with BD (N= 168)** | |  |  |
|  |
|  |
| Characteristics* | *Mean*/N | *SD*/% | *Mean*/N | *SD*/% | **T-Test§/Fisher's exact†/Mann-Whitney (W)** | **p-value** |  |
| **Age, years** | *64.2* | *11.9* | *61.8* | *12.9* | 2.0§ | 0.05 |  |
| **Age, range** | 28-89 | | 29-90 | |  |  |  |
| **Sex, women** | 255 | 76% | 97 | 58% | _† | **<.001** |  |
| **Education, years** | *10.6* | *4.2* | *11.3* | *3.7* | 1.8§ | 0.08 |  |
| **Clinical Global Impression Scale-Severity (CGI-S)** | *3.4* | *0.8* | *3.6* | *0.8* | -2.2§ | 0.03 |  |
| **History of psychiatric disorders other than MDD/BD *(yes)*** | 139 | 41% | 55 | 33% | _† | 0.07 |  |
| **Childhood Trauma Questionnaire (CTQ)** |  |  |  |  |  |  |  |
| **Scores** |  |  |  |  |  |  |  |
| Sexual abuse | *6.5* | *3.5* | *6.3* | *3.0* | 0.5§ | 0.61 |  |
| Physical abuse | *6.7* | *3.7* | *6.4* | *3.0* | 0.9§ | 0.36 |  |
| Emotional abuse | *8.6* | *4.8* | *8.6* | *4.7* | -0.0§ | 0.97 |  |
| Physical neglect | *8.0* | *3.3* | *7.5* | *3.1* | 1.6§ | 0.11 |  |
| Emotional neglect | *13.5* | *6.0* | *12.2* | *5.3* | 2.4§ | 0.02 |  |
| Total score | *43.1* | *16.8* | *40.9* | *14.7* | 1.5§ | 0.13 |  |
| Number of CTs to which patients had been exposed** | *2.0* | *1.4* | *1.9* | *1.5* | 0.7§ | 0.48 |  |
| **Classification***** |  |  |  |  |  |  |  |
| ***Sexual abuse (SA)*** |  |  |  |  |  |  |  |
| None (or Minimal) (SA subscale score= 5) | 285 | 85% | 142 | 85% |  |  |  |
| Low (to Moderate) (SA subscale score= 6-7) | 28 | 8% | 15 | 9% |  |  |  |
| Moderate (to Severe) (SA subscale score= 8-12) | 7 | 2% | 7 | 4% |  |  |  |
| Severe (to Extreme) (SA subscale score≥13) | 15 | 4% | 4 | 2% | 28034.5 | 0.91 |  |
| ***Physical abuse (PA)*** |  |  |  |  |  |  |  |
| None (or Minimal) (PA subscale score= 5-7) | 275 | 82% | 137 | 82% |  |  |  |
| Low (to Moderate) (PA subscale score= 8-9) | 17 | 5% | 14 | 8% |  |  |  |
| Moderate (to Severe) (PA subscale score= 10-12) | 17 | 5% | 8 | 5% |  |  |  |
| Severe (to Extreme) (PA subscale score≥13) | 26 | 8% | 9 | 5% | 28171.5 | 0.98 |  |
| ***Emotional abuse (EA)*** |  |  |  |  |  |  |  |
| None (or Minimal) (EA subscale score= 5-8) | 141 | 42% | 67 | 40% |  |  |  |
| Low (to Moderate) (EA subscale score= 9-12) | 56 | 17% | 28 | 17% |  |  |  |
| Moderate (to Severe) (EA subscale score= 13-15) | 81 | 24% | 44 | 26% |  |  |  |
| Severe (to Extreme) (EA subscale score≥16) | 57 | 17% | 29 | 17% | 27486 | 0.65 |  |
| ***Physical neglect (PN)*** |  |  |  |  |  |  |  |
| None (or Minimal) (PN subscale score= 5-7) | 195 | 58% | 110 | 65% |  |  |  |
| Low (to Moderate) (PN subscale score= 8-9) | 63 | 19% | 25 | 15% |  |  |  |
| Moderate (to Severe) (PN subscale score= 10-12) | 41 | 12% | 19 | 11% |  |  |  |
| Severe (to Extreme) (PN subscale score≥13) | 36 | 11% | 14 | 8% | 30163 | 0.13 |  |
| ***Emotional neglect (EN)*** |  |  |  |  |  |  |  |
| None (or Minimal) (EN subscale score= 5-9) | 96 | 29% | 58 | 35% |  |  |  |
| Low (to Moderate) (EN subscale score= 10-14) | 99 | 30% | 59 | 35% |  |  |  |
| Moderate (to Severe) (EN subscale score= 15-17) | 47 | 14% | 21 | 13% |  |  |  |
| Severe (to Extreme) (EN subscale score≥18) | 93 | 28% | 30 | 18% | 31668 | 0.02 |  |
| **Patients with at least one type of CT classified as Low (to Moderate)** | 281 | 84% | 135 | 80% | _† | 0.32 |  |
| **Patients with at least one type of CT classified as Moderate (to Severe)or Severe (to Extreme)** | 195 | 58% | 90 | 54% | _† | 0.34 |  |
| **Minimization/denial** |  |  |  |  |  |  |  |
| No items scored 1 | 238 | 71% | 121 | 72% |  |  |  |
| One item scored 1 | 62 | 19% | 25 | 15% |  |  |  |
| Two items scored 1 | 21 | 6% | 15 | 9% |  |  |  |
| Three items scored 1 | 14 | 4% | 7 | 4% |  |  |  |
| At least one item scored 1 | 97 | 29% | 47 | 28% | 28202.5 | 0.96 |  |
| *The "Characteristics" are expressed as number (N) and % or mean and standard deviation (SD): the characteristics expressed as mean and SD are *italicized*; BD: bipolar disorder; CT(s): childhood trauma(s); MDD: major depressive disorder; **the number of sub-scales in which the Cut Scores identified at least a low (to moderate) level of trauma; ***For each type of childhood trauma, the classification of exposure severity is based on the Cut Scores of each subscale reported in the brackets; p-values considered significant (i.e. <0.01) are **bolded** | | | | | | |  |
